# Supplementary material
Source: publisher site journal article supplement (https://www.dovepress.com/article/468680)
Supplement: Supplementary file 1 [file get_supplementary_file.php]

# Supplemental Materials

## Supplemental Figure 1. Proportion of patients in the EHR-derived database with ≥1 NGS HRR panel test prior to or on the date of 1L therapy initiation, by practice setting and calendar yeara,b

1L: first-line; HRR: homologous recombination repair; mCRPC: metastatic castration-resistant prostate cancer

**Notes:**

a. Testing rates are reported based on the calendar year of 1L mCRPC therapy initiation and include all HRR panel tests prior to or on the date of 1L mCRPC therapy initiation.

b. Academic and community settings were mutually exclusive. Patients observed in both the academic and community setting were included in the 'all patients' category.

## Supplemental Figure 2. Disease stage at the time of first HRR alteration test, by calendar year (CGBD)

## Supplemental Table 1. Co-occurring HRR alterations evaluated in the CGDB prior to or on the date of 1L mCRPC therapy initiation

|  | **All patients** | **White patients** | **Black patients** |
| --- | --- | --- | --- |
|  | **N=1,367** | **N=921** | **N=121** |
| Patients with >1 HRR alteration, n (%) | 31 (2.3%) | 22 (2.4%) | 4 (3.3%) |
| Co-occurring *BRCA1/2* alterations, n (%) | 14 (1.0%) | 10 (1.1%) | 3 (2.5%) |
| *BRCA2* and *CDK12* | 4 (0.3%) | 2 (0.2%) | 2 (1.7%) |
| *BRCA2* and *CHEK2* | 3 (0.2%) | 3 (0.3%) | 0 (0.0%) |
| *BRCA2* and *ATM* | 1 (0.1%) | 0 (0.0%) | 1 (0.8%) |
| *BRCA1* and *CDK12* | 1 (0.1%) | 0 (0.0%) | 0 (0.0%) |
| *BRCA1* and *BRCA2* | 1 (0.1%) | 1 (0.1%) | 0 (0.0%) |
| *BRCA2* and *BRIP1* | 1 (0.1%) | 1 (0.1%) | 0 (0.0%) |
| *BRCA2* and *FANCA* | 1 (0.1%) | 1 (0.1%) | 0 (0.0%) |
| *ATM*, *FANCA*, and *BRCA1* | 1 (0.1%) | 1 (0.1%) | 0 (0.0%) |
| *BRCA1* and CHEK2 | 1 (0.1%) | 1 (0.1%) | 0 (0.0%) |
| Non-*BRCA1/2* co-occurring alterations, n (%) | 17 (1.2%) | 12 (1.3%) | 1 (0.8%) |
| *ATM* and *CHEK2* | 5 (0.4%) | 4 (0.4%) | 0 (0.0%) |
| *ATM* and *CDK12* | 2 (0.1%) | 2 (0.2%) | 0 (0.0%) |
| *CDK12* and *CHEK2* | 2 (0.1%) | 2 (0.2%) | 0 (0.0%) |
| *CDK12* and *PALB2* | 2 (0.1%) | 1 (0.1%) | 0 (0.0%) |
| *ATM* and *PALB2* | 2 (0.1%) | 0 (0.0%) | 1 (0.8%) |
| *CDK12* and *BRIP1* | 1 (0.1%) | 1 (0.1%) | 0 (0.0%) |
| *ATM*, *CHEK2*, and *CDK12* | 1 (0.1%) | 1 (0.1%) | 0 (0.0%) |
| *CDK12* and *FANCA* | 1 (0.1%) | 1 (0.1%) | 0 (0.0%) |
| *CHEK2* and *BRIP1* | 1 (0.1%) | 0 (0.0%) | 0 (0.0%) |
| 1L: first-line; CGDB: Clinico-Genomic Database; HRR: Homologous Recombination Repair; mCRPC: metastatic castration-resistant prostate cancer. | | | |
